# Supplementary material for: Current Situation and Perspectives on Hantaviruses in Mexico
Source: PubMed Central journal article supplement (PMC6669582; doi:10.3390/v11070642), 2019-07-12
Supplement: viruses-11-00642-s001.pdf [file viruses-11-00642-s001.pdf]

**Supplementary table S1. Data analyzed by report**

| Reference                                                                                                                                                                                                                                                                                                                                                                                                                                             | Report  | State       | Species                            | Analyzed | Positives | Serological method | Antigen |
|-------------------------------------------------------------------------------------------------------------------------------------------------------------------------------------------------------------------------------------------------------------------------------------------------------------------------------------------------------------------------------------------------------------------------------------------------------|---------|-------------|------------------------------------|----------|-----------|--------------------|---------|
| Hjelle, B., Anderson, B., Torrez-Martinez, N., Song, W., Gannon, W. L., & Yates, T. L. (1995). Prevalence and geographic genetic variation of hantaviruses of New World harvest mice ( <i>Reithrodontomys</i> ): identification of a divergent genotype from a Costa Rican <i>Reithrodontomys mexicanus</i> . <i>Virology</i> , 207(2), 452–9. <a href="http://doi.org/10.1006/viro.1995.1104">http://doi.org/10.1006/viro.1995.1104</a>              | Article | Oaxaca      | <i>Reithrodontomys megalotis</i>   | 6        | 0         | ELISA              | SNV     |
| Mantooth, S. J., Milazzo, M. L., Bradley, R. D., Hice, C. L., Ceballos, G., Tesh, R. B., & Fulhorst, C. F. (2001). Geographical distribution of rodent-associated hantaviruses in Texas. <i>Journal of Vector Ecology</i> , 26(1), 7–14.                                                                                                                                                                                                              | Article | México      | <i>Peromyscus hylocetes</i>        | 8        | 2         | ELISA              | CADV    |
|                                                                                                                                                                                                                                                                                                                                                                                                                                                       |         |             | <i>Peromyscus melanotis</i>        | 9        | 2         |                    |         |
|                                                                                                                                                                                                                                                                                                                                                                                                                                                       |         | Coahuila    | <i>Peromyscus eremicus</i>         | 1        | 0         | ELISA              | CADV    |
|                                                                                                                                                                                                                                                                                                                                                                                                                                                       |         |             | <i>Dipodomys merriami</i>          | 2        | 0         |                    |         |
| Suzán, G., Ceballos, G., Mills, J., Ksiazek, T. G., & Yates, T. (2001). Serologic evidence of hantavirus infection in sigmodontine rodents in Mexico. <i>Journal of Wildlife Diseases</i> , 37(2), 391–393. <a href="http://doi.org/10.7589/0090-3558-37.2.391">http://doi.org/10.7589/0090-3558-37.2.391</a>                                                                                                                                         | Article | Mexico City | <i>Peromyscus maniculatus</i>      | 8        | 1         | ELISA              | SNV     |
|                                                                                                                                                                                                                                                                                                                                                                                                                                                       |         |             | <i>Microtus mexicanus</i>          | 1        | 0         |                    |         |
|                                                                                                                                                                                                                                                                                                                                                                                                                                                       |         |             | <i>Reithrodontomys sumichrasti</i> | 1        | 1         |                    |         |
|                                                                                                                                                                                                                                                                                                                                                                                                                                                       |         | Jalisco     | <i>Baiomys musculus</i>            | 2        | 0         |                    |         |
|                                                                                                                                                                                                                                                                                                                                                                                                                                                       |         |             | <i>Osgoodomys banderanus</i>       | 6        | 0         |                    |         |
|                                                                                                                                                                                                                                                                                                                                                                                                                                                       |         |             | <i>Oryzomys palustris</i>          | 1        | 0         |                    |         |
| Vado-Solís, I., Pérez-Osorio, C., Lara-Lara, J., Ruiz-Piña, H. a, Cárdenas-Marrufo, M., Milazzo, M. L., ... Zavala-Velázquez, J. (2003). Evidencia serológica de infección por Hantavirus en población humana del estado de Yucatán, México. <i>Revista de Biomedicina</i> , 14(4), 221–225. Retrieved from <a href="http://www.uady.mx/sitios/biomedic/revbiomed/pdf/rb031442.pdf">http://www.uady.mx/sitios/biomedic/revbiomed/pdf/rb031442.pdf</a> | Article | Yucatán     | <i>Liomys pictus</i>               | 14       | 0         |                    |         |
|                                                                                                                                                                                                                                                                                                                                                                                                                                                       |         |             | <i>Oligoryzomys fulvescens</i>     | 1        | 0         |                    |         |
|                                                                                                                                                                                                                                                                                                                                                                                                                                                       |         |             | <i>Peromyscus yucatanicus</i>      | 69       | 0         |                    |         |
|                                                                                                                                                                                                                                                                                                                                                                                                                                                       |         |             | <i>Rattus rattus</i>               | 12       | 0         |                    |         |
|                                                                                                                                                                                                                                                                                                                                                                                                                                                       |         |             | <i>Reithrodontomys gracilis</i>    | 2        | 0         |                    |         |
|                                                                                                                                                                                                                                                                                                                                                                                                                                                       |         |             | <i>Sigmodon hispidus</i>           | 8        | 0         |                    |         |
|                                                                                                                                                                                                                                                                                                                                                                                                                                                       |         |             | <i>Baiomys taylori</i>             | 1        | 0         |                    |         |
|                                                                                                                                                                                                                                                                                                                                                                                                                                                       |         |             | <i>Chaetodipus hispidus</i>        | 2        | 0         |                    |         |
|                                                                                                                                                                                                                                                                                                                                                                                                                                                       |         |             | <i>Chaetodipus penicillatus</i>    | 17       | 0         |                    |         |
|                                                                                                                                                                                                                                                                                                                                                                                                                                                       |         |             | <i>Dipodomys merriami</i>          | 4        | 0         |                    |         |
| De la Garza Ortiz, F. L. (2003). Identificación de la Presencia del Virus Sin Nombre en Roedores Silvestres del Noreste de México (Hantavirus: Bunyaviridae). Universidad Autónoma de Nuevo León.                                                                                                                                                                                                                                                     | Thesis  | Nuevo León  | <i>Liomys irroratus</i>            | 1        | 0         | ELISA              | SNV     |
|                                                                                                                                                                                                                                                                                                                                                                                                                                                       |         |             | <i>Mus musculus</i>                | 21       | 0         |                    |         |
|                                                                                                                                                                                                                                                                                                                                                                                                                                                       |         |             | <i>Neotoma albigula</i>            | 7        | 0         |                    |         |
|                                                                                                                                                                                                                                                                                                                                                                                                                                                       |         |             | <i>Neotoma mexicana</i>            | 1        | 0         |                    |         |
|                                                                                                                                                                                                                                                                                                                                                                                                                                                       |         |             | <i>Neotoma micropus</i>            | 16       | 0         |                    |         |
|                                                                                                                                                                                                                                                                                                                                                                                                                                                       |         |             | <i>Onychomys leucogaster</i>       | 4        | 0         |                    |         |
|                                                                                                                                                                                                                                                                                                                                                                                                                                                       |         |             | <i>Oryzomys couesi</i>             | 3        | 0         |                    |         |

|                                                                                                                                                                                                                                                                                                                                   |            |            |                                   |     |    |       |     |
|-----------------------------------------------------------------------------------------------------------------------------------------------------------------------------------------------------------------------------------------------------------------------------------------------------------------------------------|------------|------------|-----------------------------------|-----|----|-------|-----|
|                                                                                                                                                                                                                                                                                                                                   |            |            | <i>Perognathus flavus</i>         | 1   | 0  |       |     |
|                                                                                                                                                                                                                                                                                                                                   |            |            | <i>Peromyscus eremicus</i>        | 7   | 0  |       |     |
|                                                                                                                                                                                                                                                                                                                                   |            |            | <i>Peromyscus leucopus</i>        | 46  | 2  |       |     |
|                                                                                                                                                                                                                                                                                                                                   |            |            | <i>Peromyscus levipes</i>         | 11  | 2  |       |     |
|                                                                                                                                                                                                                                                                                                                                   |            |            | <i>Peromyscus maniculatus</i>     | 7   | 0  |       |     |
|                                                                                                                                                                                                                                                                                                                                   |            |            | <i>Peromyscus pectoralis</i>      | 19  | 2  |       |     |
|                                                                                                                                                                                                                                                                                                                                   |            |            | <i>Rattus rattus</i>              | 2   | 0  |       |     |
|                                                                                                                                                                                                                                                                                                                                   |            |            | <i>Sigmodon hispidus</i>          | 15  | 2  |       |     |
|                                                                                                                                                                                                                                                                                                                                   |            |            | <i>Chaetodipus hispidus</i>       | 7   | 0  |       |     |
|                                                                                                                                                                                                                                                                                                                                   |            |            | <i>Mus musculus</i>               | 1   | 0  |       |     |
|                                                                                                                                                                                                                                                                                                                                   | Tamaulipas |            | <i>Neotoma micropus</i>           | 13  | 0  | ELISA | SNV |
|                                                                                                                                                                                                                                                                                                                                   |            |            | <i>Onychomys leucogaster</i>      | 5   | 0  |       |     |
|                                                                                                                                                                                                                                                                                                                                   |            |            | <i>Peromyscus leucopus</i>        | 12  | 0  |       |     |
|                                                                                                                                                                                                                                                                                                                                   |            |            | <i>Sigmodon hispidus</i>          | 4   | 0  |       |     |
|                                                                                                                                                                                                                                                                                                                                   |            |            | <i>Liomys pictus</i>              | 18  | 0  |       |     |
|                                                                                                                                                                                                                                                                                                                                   |            |            | <i>Liomys spectabilis</i>         | 6   | 0  |       |     |
|                                                                                                                                                                                                                                                                                                                                   |            |            | <i>Baiomys musculus</i>           | 77  | 1  |       |     |
|                                                                                                                                                                                                                                                                                                                                   |            |            | <i>Osgoodomys banderanus</i>      | 9   | 0  |       |     |
| Chu, Y.-K., Owen, R. D., Sánchez-Hernández, C., Romero-Almaraz, M. de L., & Jonsson, C. B. (2008). Genetic characterization and phylogeny of a hantavirus from Western Mexico. <i>Virus Research</i> , 131(2), 180–188. <a href="http://doi.org/10.1016/j.virusres.2007.09.007">http://doi.org/10.1016/j.virusres.2007.09.007</a> | Article    | Colima     | <i>Peromyscus perfulvus</i>       | 16  | 0  | IFA   | SNV |
|                                                                                                                                                                                                                                                                                                                                   |            |            | <i>Reithrodontomys fulvescens</i> | 18  | 0  |       |     |
|                                                                                                                                                                                                                                                                                                                                   |            |            | <i>Oryzomys couesi</i>            | 358 | 23 |       |     |
|                                                                                                                                                                                                                                                                                                                                   |            |            | <i>Sigmodon mascotensis</i>       | 87  | 6  |       |     |
|                                                                                                                                                                                                                                                                                                                                   |            |            | <i>Nyctomys sumichrasti</i>       | 1   | 0  |       |     |
|                                                                                                                                                                                                                                                                                                                                   |            |            | <i>Peromyscus pectoralis</i>      | 62  | 0  |       |     |
|                                                                                                                                                                                                                                                                                                                                   |            |            | <i>Sigmodon toltecus</i>          | 34  | 0  |       |     |
|                                                                                                                                                                                                                                                                                                                                   |            |            | <i>Oryzomys couesi</i>            | 21  | 0  |       |     |
|                                                                                                                                                                                                                                                                                                                                   |            |            | <i>Liomys irroratus</i>           | 13  | 0  |       |     |
|                                                                                                                                                                                                                                                                                                                                   |            |            | <i>Baiomys taylori</i>            | 9   | 0  |       |     |
| Castro-Arellano, I., Suzán, G., León, R. F., Jiménez, R. M., & Lacher, T. E. (2009). Survey for antibody to hantaviruses in Tamaulipas, Mexico. <i>Journal of Wildlife Diseases</i> , 45(1), 207–212. <a href="http://doi.org/10.7589/0090-3558-45.1.207">http://doi.org/10.7589/0090-3558-45.1.207</a>                           | Article    | Tamaulipas | <i>Oligoryzomys fulvescens</i>    | 6   | 0  | ELISA | SNV |
|                                                                                                                                                                                                                                                                                                                                   |            |            | <i>Rattus rattus</i>              | 3   | 0  |       |     |
|                                                                                                                                                                                                                                                                                                                                   |            |            | <i>Reithrodontomys fulvescens</i> | 2   | 0  |       |     |
|                                                                                                                                                                                                                                                                                                                                   |            |            | <i>Mus musculus</i>               | 1   | 0  |       |     |
|                                                                                                                                                                                                                                                                                                                                   |            |            | <i>Oryzomys rostratus</i>         | 1   | 0  |       |     |
|                                                                                                                                                                                                                                                                                                                                   |            |            | <i>Peromyscus levipes</i>         | 31  | 7  |       |     |
|                                                                                                                                                                                                                                                                                                                                   |            |            | <i>Peromyscus ochraventer</i>     | 11  | 0  |       |     |

|                 |                                    |    |   |       |      |
|-----------------|------------------------------------|----|---|-------|------|
|                 | <i>Oryzomys chapmani</i>           | 4  | 0 |       |      |
| Chiapas         | <i>Oryzomys couesi</i>             | 7  | 1 | ELISA | CADV |
|                 | <i>Baiomys musculus</i>            | 6  | 1 |       |      |
| Guerrero        | <i>Baiomys musculus</i>            | 1  | 0 | ELISA | CADV |
|                 | <i>Peromyscus levipes</i>          | 2  | 0 |       |      |
|                 | <i>Peromyscus megalops</i>         | 29 | 1 |       |      |
|                 | <i>Reithrodontomys sumichrasti</i> | 18 | 3 |       |      |
| Jalisco         | <i>Baiomys taylori</i>             | 13 | 1 | ELISA | CADV |
|                 | <i>Peromyscus spicilegus</i>       | 9  | 2 |       |      |
| México          | <i>Peromyscus hyllocetes</i>       | 8  | 2 | ELISA | CADV |
|                 | <i>Peromyscus levipes</i>          | 1  | 0 |       |      |
|                 | <i>Peromyscus melanotis</i>        | 9  | 2 |       |      |
| Michoacan       | <i>Peromyscus melanotis</i>        | 1  | 0 | ELISA | CADV |
|                 | <i>Peromyscus spp</i>              | 1  | 0 |       |      |
|                 | <i>Reithrodontomys microdon</i>    | 1  | 1 |       |      |
|                 | <i>Reithrodontomys sumichrasti</i> | 2  | 2 |       |      |
| Nayarit         | <i>Peromyscus spp</i>              | 27 | 1 | ELISA | CADV |
| Nuevo León      | <i>Peromyscus eremicus</i>         | 5  | 1 | ELISA | CADV |
|                 | <i>Peromyscus leucopus</i>         | 1  | 0 |       |      |
|                 | <i>Peromyscus maniculatus</i>      | 9  | 1 |       |      |
|                 | <i>Reithrodontomys megalotis</i>   | 3  | 0 |       |      |
|                 | <i>Peromyscus levipes</i>          | 21 | 3 |       |      |
|                 | <i>Reithrodontomys megalotis</i>   | 1  | 0 |       |      |
| San Luís Potosi | <i>Peromyscus eremicus</i>         | 6  | 0 | ELISA | CADV |
|                 | <i>Peromyscus maniculatus</i>      | 5  | 1 |       |      |
|                 | <i>Reithrodontomys megalotis</i>   | 5  | 0 |       |      |
|                 | <i>Peromyscus levipes</i>          | 16 | 1 |       |      |
| Tamaulipas      | <i>Peromyscus ochraeater</i>       | 11 | 2 | ELISA | CADV |
|                 | <i>Peromyscus leucopus</i>         | 7  | 1 |       |      |
|                 | <i>Baiomys taylori</i>             | 1  | 0 |       |      |
| Veracruz        | <i>Peromyscus leucopus</i>         | 6  | 1 | ELISA | CADV |
|                 | <i>Peromyscus maniculatus</i>      | 4  | 0 |       |      |
|                 | <i>Peromyscus melanotis</i>        | 2  | 0 |       |      |
|                 | <i>Reithrodontomys megalotis</i>   | 8  | 3 |       |      |
|                 | <i>Baiomys musculus</i>            | 1  | 0 |       |      |

Milazzo, M. L., Cajimat, M. N. B., Romo, H. E., Estrada-Franco, J. G., Ignacio Iñiguez-Dávalos, L., Bradley, R. D., & Fulhorst, C. F. (2012). Geographic distribution of hantaviruses associated with Neotomine and Sigmodontine rodents, Mexico. *Emerging Infectious Diseases*, 18(4), 571–576. <http://doi.org/10.3201/eid1804.111028>

Article

|                             |                                   |    |   |       |      |
|-----------------------------|-----------------------------------|----|---|-------|------|
|                             | <i>Peromyscus maniculatus</i>     | 1  | 1 |       |      |
|                             | <i>Peromyscus melanotis</i>       | 23 | 0 |       |      |
|                             | <i>Reithrodontomys megalotis</i>  | 9  | 1 |       |      |
|                             | <i>Peromyscus melanotis</i>       | 34 | 1 |       |      |
|                             | <i>Reithrodontomys megalotis</i>  | 3  | 1 |       |      |
| Chihuahua                   | <i>Baiomys taylori</i>            | 2  | 0 |       |      |
|                             | <i>Peromyscus boylii</i>          | 3  | 0 |       |      |
|                             | <i>Peromyscus truei</i>           | 1  | 0 | ELISA | CADV |
|                             | <i>Peromyscus spp</i>             | 1  | 0 |       |      |
|                             | <i>Reithrodontomys fulvescens</i> | 1  | 0 |       |      |
|                             | <i>Sigmodon ochrognathus</i>      | 1  | 0 |       |      |
| Coahuila                    | <i>Peromyscus eremicus</i>        | 8  | 0 |       |      |
|                             | <i>Peromyscus hooperi</i>         | 6  | 0 | ELISA | CADV |
|                             | <i>Peromyscus pectoralis</i>      | 2  | 0 |       |      |
| Guanajuato                  | <i>Baiomys taylori</i>            | 1  | 0 |       |      |
|                             | <i>Peromyscus melanophrys</i>     | 5  | 0 | ELISA | CADV |
|                             | <i>Sigmodon mascotensis</i>       | 2  | 0 |       |      |
| Oaxaca                      | <i>Baiomys musculus</i>           | 14 | 0 |       |      |
|                             | <i>Habromys ixtlani</i>           | 5  | 0 |       |      |
|                             | <i>Hodomys alleni</i>             | 1  | 0 |       |      |
|                             | <i>Neotoma mexicana</i>           | 3  | 0 |       |      |
|                             | <i>Oryzomys alfaroi</i>           | 1  | 0 |       |      |
|                             | <i>Oryzomys couesi</i>            | 1  | 0 |       |      |
|                             | <i>Peromyscus aztecus</i>         | 1  | 0 | ELISA | CADV |
|                             | <i>Peromyscus batae</i>           | 21 | 0 |       |      |
|                             | <i>Peromyscus difficilis</i>      | 1  | 0 |       |      |
|                             | <i>Reithrodontomys fulvescens</i> | 1  | 0 |       |      |
|                             | <i>Reithrodontomys microdon</i>   | 1  | 0 |       |      |
| <i>Sigmodon mascotensis</i> | 14                                | 0  |   |       |      |
| Puebla                      | <i>Baiomys taylori</i>            | 4  | 0 |       |      |
|                             | <i>Peromyscus gratus</i>          | 5  | 0 |       |      |
|                             | <i>Peromyscus melanophrys</i>     | 5  | 0 | ELISA | CADV |
|                             | <i>Reithrodontomys fulvescens</i> | 1  | 0 |       |      |
| Sinaloa                     | <i>Baiomys taylori</i>            | 9  | 0 | ELISA | CADV |
| Sonora                      | <i>Neotoma albigula</i>           | 6  | 0 | ELISA | CADV |

|                                                                                                                                                                                                                                                                                                                                                                                                             |          |                                  |     |    |       |            |
|-------------------------------------------------------------------------------------------------------------------------------------------------------------------------------------------------------------------------------------------------------------------------------------------------------------------------------------------------------------------------------------------------------------|----------|----------------------------------|-----|----|-------|------------|
|                                                                                                                                                                                                                                                                                                                                                                                                             |          | <i>Onychomys torridus</i>        | 3   | 0  |       |            |
|                                                                                                                                                                                                                                                                                                                                                                                                             |          | <i>Peromyscus boylii</i>         | 6   | 0  |       |            |
|                                                                                                                                                                                                                                                                                                                                                                                                             |          | <i>Peromyscus merriami</i>       | 6   | 0  |       |            |
|                                                                                                                                                                                                                                                                                                                                                                                                             |          | <i>Peromyscus schmidlyi</i>      | 1   | 0  |       |            |
|                                                                                                                                                                                                                                                                                                                                                                                                             |          | <i>Peromyscus difficilis</i>     | 8   | 0  |       |            |
|                                                                                                                                                                                                                                                                                                                                                                                                             | Tlaxcala | <i>Peromyscus maniculatus</i>    | 1   | 0  | ELISA | CADV       |
|                                                                                                                                                                                                                                                                                                                                                                                                             |          | <i>Reithrodontomys megalotis</i> | 7   | 0  |       |            |
|                                                                                                                                                                                                                                                                                                                                                                                                             |          | <i>Heteromys irruratus</i>       | 2   | 0  |       |            |
|                                                                                                                                                                                                                                                                                                                                                                                                             |          | <i>Microtus mexicanus</i>        | 15  | 0  |       |            |
|                                                                                                                                                                                                                                                                                                                                                                                                             |          | <i>Mus musculus</i>              | 12  | 0  |       |            |
|                                                                                                                                                                                                                                                                                                                                                                                                             | Morelos  | <i>Neotoma alstoni</i>           | 2   | 0  | ELISA | SNV & MTNV |
|                                                                                                                                                                                                                                                                                                                                                                                                             |          | <i>Neotoma mexicana</i>          | 1   | 0  |       |            |
|                                                                                                                                                                                                                                                                                                                                                                                                             |          | <i>Peromyscus hylocetes</i>      | 13  | 0  |       |            |
|                                                                                                                                                                                                                                                                                                                                                                                                             |          | <i>Peromyscus maniculatus</i>    | 2   | 0  |       |            |
|                                                                                                                                                                                                                                                                                                                                                                                                             |          | <i>Reithrodontomys megalotis</i> | 25  | 2  |       |            |
|                                                                                                                                                                                                                                                                                                                                                                                                             |          | <i>Baiomys musculus</i>          | 5   | 0  |       |            |
|                                                                                                                                                                                                                                                                                                                                                                                                             |          | <i>Heteromys irruratus</i>       | 13  | 0  |       |            |
|                                                                                                                                                                                                                                                                                                                                                                                                             |          | <i>Heteromys pictus</i>          | 5   | 0  |       |            |
|                                                                                                                                                                                                                                                                                                                                                                                                             |          | <i>Hodomys alleni</i>            | 4   | 0  |       |            |
|                                                                                                                                                                                                                                                                                                                                                                                                             |          | <i>Megadontomys thomasi</i>      | 9   | 1  |       |            |
|                                                                                                                                                                                                                                                                                                                                                                                                             |          | <i>Neotoma picta</i>             | 6   | 1  |       |            |
|                                                                                                                                                                                                                                                                                                                                                                                                             |          | <i>Handleyomys melanotis</i>     | 2   | 0  |       |            |
|                                                                                                                                                                                                                                                                                                                                                                                                             |          | <i>Oryzomys couesi</i>           | 16  | 0  |       |            |
|                                                                                                                                                                                                                                                                                                                                                                                                             |          | <i>Handleyomys alfaroi</i>       | 3   | 0  |       |            |
|                                                                                                                                                                                                                                                                                                                                                                                                             | Guerrero | <i>Osgoodomys banderanus</i>     | 36  | 0  | ELISA | SNV & MTNV |
|                                                                                                                                                                                                                                                                                                                                                                                                             |          | <i>Peromyscus mexicanus</i>      | 10  | 0  |       |            |
|                                                                                                                                                                                                                                                                                                                                                                                                             |          | <i>Peromyscus aztecus</i>        | 1   | 1  |       |            |
|                                                                                                                                                                                                                                                                                                                                                                                                             |          | <i>Peromyscus batae</i>          | 127 | 31 |       |            |
|                                                                                                                                                                                                                                                                                                                                                                                                             |          | <i>Peromyscus lepturus</i>       | 5   | 0  |       |            |
|                                                                                                                                                                                                                                                                                                                                                                                                             |          | <i>Peromyscus levipes</i>        | 11  | 0  |       |            |
|                                                                                                                                                                                                                                                                                                                                                                                                             |          | <i>Peromyscus megalops</i>       | 41  | 1  |       |            |
|                                                                                                                                                                                                                                                                                                                                                                                                             |          | <i>Peromyscus melanocarpus</i>   | 2   | 0  |       |            |
|                                                                                                                                                                                                                                                                                                                                                                                                             |          | <i>Peromyscus melanophrys</i>    | 9   | 0  |       |            |
|                                                                                                                                                                                                                                                                                                                                                                                                             |          | <i>Peromyscus spp</i>            | 1   | 0  |       |            |
| Kariwa, H., Yoshida, H., Sánchez-Hernández, C., Romero-Almaraz, M. D. L., Almazán-Catalán, J. A., Ramos, C., ... Takashima, I. (2012). Genetic diversity of hantaviruses in Mexico: Identification of three novel hantaviruses from Neotominae rodents. <i>Virus Research</i> , 163(2), 486–494. <a href="http://doi.org/10.1016/j.virusres.2011.11.013">http://doi.org/10.1016/j.virusres.2011.11.013</a>  | Article  |                                  |     |    |       |            |
| Saasa, N., Sánchez-Hernández, C., de Lourdes Romero-Almaraz, M., Guerrero-Ibarra, E., Almazán-Catalán, A., Yoshida, H., ... Kariwa, H. (2012). Ecology of hantaviruses in Mexico: Genetic identification of rodent host species and spillover infection. <i>Virus Research</i> , 168(1–2), 88–96. <a href="http://doi.org/10.1016/j.virusres.2012.06.020">http://doi.org/10.1016/j.virusres.2012.06.020</a> |          |                                  |     |    |       |            |

|                                                                                                                                                                                                                                                                                                                                                    |                             |                               |                                    |       |       |       |     |
|----------------------------------------------------------------------------------------------------------------------------------------------------------------------------------------------------------------------------------------------------------------------------------------------------------------------------------------------------|-----------------------------|-------------------------------|------------------------------------|-------|-------|-------|-----|
|                                                                                                                                                                                                                                                                                                                                                    |                             |                               | <i>Reithrodontomys spp</i>         | 1     | 0     |       |     |
|                                                                                                                                                                                                                                                                                                                                                    |                             |                               | <i>Reithrodontomys sumichrasti</i> | 15    | 6     |       |     |
|                                                                                                                                                                                                                                                                                                                                                    |                             |                               | <i>Sigmodon mascotensis</i>        | 1     | 0     |       |     |
|                                                                                                                                                                                                                                                                                                                                                    |                             |                               | <i>Tylomys nudicaudus</i>          | 11    | 0     |       |     |
| Arellano, E., Castro-Arellano, I., Suzán, G., González-Cózatl, F. X., & Jiménez, R. M. (2012). Antibody Seroprevalence to Hantaviruses in Rodents from Reserva De La Biosfera Sierra De Huautla, Morelos. Western North American Naturalist, 72(1), 105–109. <a href="http://doi.org/10.3398/064.072.0114">http://doi.org/10.3398/064.072.0114</a> | Article                     | Morelos                       | <i>Liomys irroratus</i>            | 91    | 1     |       |     |
|                                                                                                                                                                                                                                                                                                                                                    |                             |                               | <i>Baiomys musculus</i>            | 24    | 0     |       |     |
|                                                                                                                                                                                                                                                                                                                                                    |                             |                               | <i>Peromyscus levipes</i>          | 2     | 0     | ELISA | SNV |
|                                                                                                                                                                                                                                                                                                                                                    |                             |                               | <i>Peromyscus melanophrys</i>      | 12    | 0     |       |     |
|                                                                                                                                                                                                                                                                                                                                                    |                             |                               | <i>Reithrodontomys fulvescens</i>  | 19    | 0     |       |     |
|                                                                                                                                                                                                                                                                                                                                                    |                             |                               | <i>Sigmodon hispidus</i>           | 3     | 0     |       |     |
|                                                                                                                                                                                                                                                                                                                                                    |                             |                               |                                    |       |       |       |     |
| González-Padrón, S. K. (2014). Diversidad y abundancia de roedores reservorios de hantavirus en un gradiente de impacto antropogénico en México. Universidad Nacional Autónoma de México.                                                                                                                                                          | Thesis                      | Veracruz                      | <i>Microtus quasiater</i>          | 3     | 0     |       |     |
|                                                                                                                                                                                                                                                                                                                                                    |                             |                               | <i>Mus musculus</i>                | 14    | 1     |       |     |
|                                                                                                                                                                                                                                                                                                                                                    |                             |                               | <i>Oryzomys couesi</i>             | 4     | 0     |       |     |
|                                                                                                                                                                                                                                                                                                                                                    |                             |                               | <i>Peromyscus furvus</i>           | 23    | 1     |       |     |
|                                                                                                                                                                                                                                                                                                                                                    |                             |                               | <i>Peromyscus leucopus</i>         | 2     | 0     |       |     |
|                                                                                                                                                                                                                                                                                                                                                    |                             |                               | <i>Peromyscus levipes</i>          | 6     | 1     | ELISA | SNV |
|                                                                                                                                                                                                                                                                                                                                                    |                             |                               | <i>Peromyscus maniculatus</i>      | 28    | 1     |       |     |
|                                                                                                                                                                                                                                                                                                                                                    |                             |                               | <i>Peromyscus mexicanus</i>        | 15    | 0     |       |     |
|                                                                                                                                                                                                                                                                                                                                                    |                             |                               | <i>Rattus rattus</i>               | 1     | 0     |       |     |
|                                                                                                                                                                                                                                                                                                                                                    |                             |                               | <i>Reithrodontomys fulvescens</i>  | 1     | 0     |       |     |
|                                                                                                                                                                                                                                                                                                                                                    |                             |                               | <i>Reithrodontomys mexicanus</i>   | 1     | 0     |       |     |
|                                                                                                                                                                                                                                                                                                                                                    |                             |                               | <i>Sigmodon hispidus</i>           | 1     | 0     |       |     |
|                                                                                                                                                                                                                                                                                                                                                    |                             |                               |                                    |       |       |       |     |
|                                                                                                                                                                                                                                                                                                                                                    | Hidalgo                     | <i>Baiomys taylori</i>        | 14                                 | 4     |       |       |     |
|                                                                                                                                                                                                                                                                                                                                                    |                             | <i>Liomys irroratus</i>       | 14                                 | 2     |       |       |     |
|                                                                                                                                                                                                                                                                                                                                                    |                             | <i>Mus musculus</i>           | 5                                  | 3     |       |       |     |
|                                                                                                                                                                                                                                                                                                                                                    |                             | <i>Perognathus flavus</i>     | 2                                  | 1     |       |       |     |
|                                                                                                                                                                                                                                                                                                                                                    |                             | <i>Peromyscus difficilis</i>  | 29                                 | 11    | ELISA | SNV   |     |
|                                                                                                                                                                                                                                                                                                                                                    |                             | <i>Peromyscus gratus</i>      | 21                                 | 13    |       |       |     |
|                                                                                                                                                                                                                                                                                                                                                    |                             | <i>Peromyscus leucopus</i>    | 2                                  | 1     |       |       |     |
|                                                                                                                                                                                                                                                                                                                                                    |                             | <i>Peromyscus maniculatus</i> | 42                                 | 28    |       |       |     |
|                                                                                                                                                                                                                                                                                                                                                    |                             | <i>Peromyscus spp</i>         | 6                                  | 1     |       |       |     |
|                                                                                                                                                                                                                                                                                                                                                    |                             | <i>Rattus spp</i>             | 1                                  | 1     |       |       |     |
| Campeche                                                                                                                                                                                                                                                                                                                                           | <i>Heteromys guameri</i>    | 7                             | 0                                  | ELISA | SNV   |       |     |
|                                                                                                                                                                                                                                                                                                                                                    | <i>Ototylomys phyllotis</i> | 1                             | 0                                  |       |       |       |     |

|                                                                                                                                                                                                                                                                                                                                         |         |           |                                   |    |    |       |      |
|-----------------------------------------------------------------------------------------------------------------------------------------------------------------------------------------------------------------------------------------------------------------------------------------------------------------------------------------|---------|-----------|-----------------------------------|----|----|-------|------|
|                                                                                                                                                                                                                                                                                                                                         |         |           | <i>Peromyscus spp</i>             | 2  | 0  |       |      |
|                                                                                                                                                                                                                                                                                                                                         |         |           | <i>Rattus rattus</i>              | 3  | 0  |       |      |
|                                                                                                                                                                                                                                                                                                                                         |         |           | <i>Reithrodontomys gracilis</i>   | 1  | 0  |       |      |
|                                                                                                                                                                                                                                                                                                                                         |         |           | <i>Sigmodon hispidus</i>          | 13 | 1  |       |      |
|                                                                                                                                                                                                                                                                                                                                         |         |           | <i>Liomys pictus</i>              | 13 | 0  |       |      |
|                                                                                                                                                                                                                                                                                                                                         |         |           | <i>Peromyscus banderanus</i>      | 14 | 2  |       |      |
|                                                                                                                                                                                                                                                                                                                                         | Jalisco |           | <i>Peromyscus perfulvus</i>       | 14 | 4  | ELISA | SNV  |
|                                                                                                                                                                                                                                                                                                                                         |         |           | <i>Reithrodontomys fulvescens</i> | 1  | 0  |       |      |
|                                                                                                                                                                                                                                                                                                                                         |         |           | <i>Sigmodon mascotensis</i>       | 1  | 0  |       |      |
|                                                                                                                                                                                                                                                                                                                                         |         |           | <i>Dipodomys merriami</i>         | 29 | 0  |       |      |
|                                                                                                                                                                                                                                                                                                                                         |         |           | <i>Peromyscus maniculatus</i>     | 26 | 3  |       |      |
|                                                                                                                                                                                                                                                                                                                                         |         |           | <i>Sigmodon hispidus</i>          | 9  | 0  |       |      |
|                                                                                                                                                                                                                                                                                                                                         |         |           | <i>Neotoma albigula</i>           | 9  | 0  |       |      |
|                                                                                                                                                                                                                                                                                                                                         |         |           | <i>Onychomys leucogaster</i>      | 22 | 0  |       |      |
| Moreno-Torres, K., Gual-Sill, F., Morales-Jiménez, R., Rubio, A. V., Ceballos, G., & Suzán, G. (2014). Serological Survey of Hantavirus In Rodents From Prairie Dog Ecosystems In Chihuahua, Mexico. The Southwestern Naturalist, 59(July 2015), 590–594. <a href="http://doi.org/10.1894/SGM-37.1">http://doi.org/10.1894/SGM-37.1</a> | Article | Chihuahua | <i>Perognathus flavus</i>         | 16 | 0  | ELISA | CADV |
|                                                                                                                                                                                                                                                                                                                                         |         |           | <i>Dipodomys ordii</i>            | 3  | 0  |       |      |
|                                                                                                                                                                                                                                                                                                                                         |         |           | <i>Dipodomys spectabilis</i>      | 7  | 0  |       |      |
|                                                                                                                                                                                                                                                                                                                                         |         |           | <i>Peromyscus leucopus</i>        | 1  | 0  |       |      |
|                                                                                                                                                                                                                                                                                                                                         |         |           | <i>Reithrodontomys megalotis</i>  | 1  | 0  |       |      |
|                                                                                                                                                                                                                                                                                                                                         |         |           | <i>Baiomys taylori</i>            | 26 | 0  |       |      |
|                                                                                                                                                                                                                                                                                                                                         |         |           | <i>Heteromys desmarestianus</i>   | 7  | 0  |       |      |
|                                                                                                                                                                                                                                                                                                                                         |         |           | <i>Heteromys gaumeri</i>          | 53 | 3  |       |      |
|                                                                                                                                                                                                                                                                                                                                         |         |           | <i>Mus musculus</i>               | 51 | 0  |       |      |
|                                                                                                                                                                                                                                                                                                                                         |         |           | <i>Oligoryzomys fulvescens</i>    | 22 | 2  |       |      |
|                                                                                                                                                                                                                                                                                                                                         |         |           | <i>Oryzomys couesi</i>            | 4  | 1  |       |      |
| Ortiz Chabolla, D. J. Efecto Del Paisaje Sobre La Diversidad de Roedores y Prevalencia de Anticuerpos Contra Hantavirus En Una Región Ganadera Del Este de Yucatán, México, Universidad Nacional Autónoma de México, 2018                                                                                                               | Thesis  | Yucatán   | <i>Ototylomys phyllotis</i>       | 20 | 0  | ELISA | SNV  |
|                                                                                                                                                                                                                                                                                                                                         |         |           | <i>Peromyscus leucopus</i>        | 39 | 2  |       |      |
|                                                                                                                                                                                                                                                                                                                                         |         |           | <i>Peromyscus yucatanicus</i>     | 46 | 2  |       |      |
|                                                                                                                                                                                                                                                                                                                                         |         |           | <i>Rattus rattus</i>              | 10 | 2  |       |      |
|                                                                                                                                                                                                                                                                                                                                         |         |           | <i>Reithrodontomys gracilis</i>   | 19 | 0  |       |      |
|                                                                                                                                                                                                                                                                                                                                         |         |           | <i>Sigmodon hispidus</i>          | 82 | 13 |       |      |
|                                                                                                                                                                                                                                                                                                                                         |         |           | <i>Baiomys taylori</i>            | 3  | 2  |       |      |
| Rubio, A. V., Viguera-Galván, A. L., Schountz, T., Moreno-Torres, K., List, R., Sarmiento-Silva, R. E., ... Suzán, G. (2015). Abundance of hantavirus hosts in a landscape with black-tailed prairie dog colonies in                                                                                                                    | Article | Chihuahua | <i>Chaetodipus hispidus</i>       | 22 | 1  | ELISA | SNV  |
|                                                                                                                                                                                                                                                                                                                                         |         |           | <i>Chaetodipus penicillatus</i>   | 86 | 11 |       |      |

northwestern Mexico. *Mammalian Biology - Zeitschrift Für Säugetierkunde*, 80(6), 491–495.  
<http://doi.org/10.1016/j.mambio.2015.06.004>

|  |             |                                   |     |    |       |     |
|--|-------------|-----------------------------------|-----|----|-------|-----|
|  |             | <i>Dipodomys merriami</i>         | 263 | 54 |       |     |
|  |             | <i>Dipodomys ordii</i>            | 9   | 0  |       |     |
|  |             | <i>Dipodomys spectabilis</i>      | 114 | 27 |       |     |
|  |             | <i>Neotoma albigula</i>           | 8   | 4  |       |     |
|  |             | <i>Onychomys arenicola</i>        | 92  | 20 |       |     |
|  |             | <i>Onychomys leucogaster</i>      | 13  | 2  |       |     |
|  |             | <i>Perognathus flavus</i>         | 42  | 5  |       |     |
|  |             | <i>Peromyscus boylii</i>          | 6   | 1  |       |     |
|  |             | <i>Peromyscus leucopus</i>        | 18  | 6  |       |     |
|  |             | <i>Peromyscus maniculatus</i>     | 46  | 11 |       |     |
|  |             | <i>Xerospermophilus spilosoma</i> | 9   | 1  |       |     |
|  |             | <i>Peromyscus melanotis</i>       | 16  | 0  |       |     |
|  |             | <i>Peromyscus leucopus</i>        | 1   | 0  |       |     |
|  |             | <i>Peromyscus levipes</i>         | 4   | 0  |       |     |
|  |             | <i>Microtus mexicanus</i>         | 3   | 0  |       |     |
|  |             | <i>Reithrodontomys mexicanus</i>  | 3   | 0  |       |     |
|  |             | <i>Peromyscus mexicanus</i>       | 1   | 0  |       |     |
|  |             | <i>Liomys irroratus</i>           | 17  | 0  |       |     |
|  | Hidalgo     | <i>Reithrodontomys mexicanus</i>  | 10  | 0  | ELISA | SNV |
|  |             | <i>Peromyscus maniculatus</i>     | 2   | 0  |       |     |
|  |             | <i>Mus musculus</i>               | 1   | 0  |       |     |
|  |             | <i>Rattus rattus</i>              | 1   | 0  |       |     |
|  |             | <i>Peromyscus melanotis</i>       | 20  | 0  |       |     |
|  |             | <i>Peromyscus difficilis</i>      | 2   | 0  |       |     |
|  |             | <i>Reithrodontomys megalotis</i>  | 1   | 0  |       |     |
|  |             | <i>Liomys irroratus</i>           | 1   | 0  |       |     |
|  |             | <i>Peromyscus difficilis</i>      | 1   | 0  |       |     |
|  |             | <i>Peromyscus gratus</i>          | 14  | 6  |       |     |
|  |             | <i>Peromyscus difficilis</i>      | 1   | 0  |       |     |
|  | Mexico City | <i>Mus musculus</i>               | 4   | 0  | ELISA | SNV |
|  |             | <i>Peromyscus melanotis</i>       | 1   | 1  |       |     |
|  |             | <i>Mus musculus</i>               | 2   | 0  |       |     |
|  |             | <i>Peromyscus melanophrys</i>     | 1   | 0  |       |     |
|  | Sonora      | <i>Dipodomys merriami</i>         | 1   | 0  | ELISA | SNV |

Laboratorio de Ecología de Enfermedades y Una Salud (Laboratory of Disease Ecology and One Health) of the FMVZ-UNAM

Material  
not  
intended  
for  
publication



---

|                                 |      |     |
|---------------------------------|------|-----|
| <i>Onychomys arenicola</i>      | 4    | 4   |
| <i>Chaetodipus penicillatus</i> | 6    | 0   |
| <i>Peromyscus maniculatus</i>   | 2    | 1   |
| <i>Sigmodon hispidus</i>        | 3    | 1   |
| <i>Chaetodipus hispidus</i>     | 2    | 0   |
| <i>TOTAL</i>                    | 3862 | 392 |

---

ELISA: Enzyme-Linked Immunosorbent Assay. IFA: Immunofluorescence Assay. The Laboratorio de Ecología de Enfermedades y Una Salud of the FMVZ-UNAM collected the unpublished data with different sampling designs, all samples obtained by retro-orbital plexus puncture, preserved in Nobuto blood filter strips (Cole-Parmer, Vernon Hills,IL) and analyzed in the Laboratorio de Virología of the FMVZ-UNAM.

**Supplementary table S2. Seroprevalence by State**

| State           | Analyzed | Positives | SP(%) | WSP (%) |
|-----------------|----------|-----------|-------|---------|
| Campeche        | 27       | 1         | 3.70  | 5.30    |
| Chiapas         | 13       | 2         | 15.38 | 17.14   |
| Chihuahua       | 880      | 147       | 16.70 | 49.19   |
| Coahuila        | 19       | 0         | -     | -       |
| Colima          | 590      | 20        | 3.39  | 9.39    |
| Mexico City     | 33       | 9         | 27.27 | 41.41   |
| Mexico State    | 35       | 8         | 22.86 | 35.29   |
| Guanajuato      | 8        | 0         | -     | -       |
| Guerrero        | 384      | 45        | 11.72 | 30.29   |
| Hidalgo         | 220      | 65        | 29.55 | 69.21   |
| Jalisco         | 88       | 9         | 10.23 | 19.89   |
| Michoacan       | 5        | 3         | 6-    | 41.94   |
| Morelos         | 223      | 3         | 1.35  | 3.16    |
| Nayarit         | 27       | 1         | 3.70  | 5.30    |
| Nuevo Leon      | 225      | 13        | 5.78  | 13.59   |
| Oaxaca          | 70       | 0         | -     | -       |
| Puebla          | 15       | 0         | -     | -       |
| San Luis Potosi | 43       | 4         | 9.30  | 15.20   |
| Sinaloa         | 9        | 0         | -     | -       |
| Sonora          | 40       | 6         | 15.00 | 24.03   |
| Tamaulipas      | 254      | 9         | 3.54  | 8.52    |
| Tlaxcala        | 16       | 0         | -     | -       |
| Veracruz        | 184      | 11        | 5.98  | 13.54   |
| Yucatan         | 445      | 25        | 5.62  | 14.88   |

SP. Seroprevalence. WSP. Weighted seroprevalence

**Supplementary table S3. Seroprevalence by species**

| Family     | Species                        | Analyzed | Positives | SP (%) | WSP   |
|------------|--------------------------------|----------|-----------|--------|-------|
| Cricetidae | <i>Baiomys musculus</i>        | 130      | 2         | 1.54   | 3.25  |
| Cricetidae | <i>Baiomys taylori</i>         | 83       | 7         | 8.43   | 16.18 |
| Cricetidae | <i>Habromys ixtlani</i>        | 5        | 0         | -      | -     |
| Cricetidae | <i>Handleyomys alfaroi</i>     | 3        | 0         | -      | -     |
| Cricetidae | <i>Handleyomys melanotis</i>   | 2        | 0         | -      | -     |
| Cricetidae | <i>Hodomys alleni</i>          | 1        | 0         | -      | -     |
| Cricetidae | <i>Megadontomys thomasi</i>    | 9        | 1         | 11.11  | 10.60 |
| Cricetidae | <i>Microtus mexicanus</i>      | 19       | 0         | -      | -     |
| Cricetidae | <i>Microtus quasiater</i>      | 3        | 0         | -      | -     |
| Cricetidae | <i>Neotoma albigula</i>        | 30       | 4         | 13.33  | 19.69 |
| Cricetidae | <i>Neotoma alstoni</i>         | 2        | 0         | -      | -     |
| Cricetidae | <i>Neotoma mexicana</i>        | 5        | 0         | -      | -     |
| Cricetidae | <i>Neotoma micropus</i>        | 29       | 0         | -      | -     |
| Cricetidae | <i>Neotoma picta</i>           | 6        | 1         | 16.67  | 12.97 |
| Cricetidae | <i>Nyctomys sumichrasti</i>    | 1        | 0         | -      | -     |
| Cricetidae | <i>Oligoryzomys fulvescens</i> | 29       | 2         | 6.90   | 10.09 |
| Cricetidae | <i>Onychomys arenicola</i>     | 96       | 24        | 25.00  | 49.56 |
| Cricetidae | <i>Onychomys leucogaster</i>   | 44       | 2         | 4.55   | 7.47  |
| Cricetidae | <i>Onychomys torridus</i>      | 3        | 0         | -      | -     |
| Cricetidae | <i>Oryzomys alfaroi</i>        | 1        | 0         | -      | -     |
| Cricetidae | <i>Oryzomys chapmani</i>       | 4        | 0         | -      | -     |
| Cricetidae | <i>Oryzomys couesi</i>         | 414      | 25        | 6.04   | 15.80 |
| Cricetidae | <i>Oryzomys palustris</i>      | 1        | 0         | -      | -     |
| Cricetidae | <i>Oryzomys rostratus</i>      | 1        | 0         | -      | -     |
| Cricetidae | <i>Osgoodomys banderanus</i>   | 51       | 0         | -      | -     |
| Cricetidae | <i>Ototylomys phyllotis</i>    | 21       | 0         | -      | -     |
| Cricetidae | <i>Peromyscus aztecus</i>      | 2        | 1         | 50     | 15.05 |
| Cricetidae | <i>Peromyscus banderanus</i>   | 14       | 2         | 14.29  | 16.37 |
| Cricetidae | <i>Peromyscus beatae</i>       | 148      | 31        | 20.95  | 45.46 |
| Cricetidae | <i>Peromyscus boylii</i>       | 15       | 1         | 6.67   | 7.84  |
| Cricetidae | <i>Peromyscus difficilis</i>   | 42       | 11        | 26.19  | 42.51 |
| Cricetidae | <i>Peromyscus eremicus</i>     | 27       | 1         | 3.70   | 5.30  |
| Cricetidae | <i>Peromyscus furvus</i>       | 23       | 1         | 4.35   | 5.92  |
| Cricetidae | <i>Peromyscus gratus</i>       | 40       | 19        | 47.50  | 76.10 |
| Cricetidae | <i>Peromyscus hooperi</i>      | 6        | 0         | -      | -     |
| Cricetidae | <i>Peromyscus hylocetes</i>    | 29       | 4         | 13.79  | 20.17 |
| Cricetidae | <i>Peromyscus lepturus</i>     | 5        | 0         | -      | -     |
| Cricetidae | <i>Peromyscus leucopus</i>     | 133      | 13        | 9.77   | 20.76 |
| Cricetidae | <i>Peromyscus levipes</i>      | 107      | 14        | 13.08  | 26.55 |
| Cricetidae | <i>Peromyscus maniculatus</i>  | 183      | 48        | 26.23  | 59.34 |
| Cricetidae | <i>Peromyscus megalops</i>     | 70       | 2         | 2.86   | 5.27  |
| Cricetidae | <i>Peromyscus melanocarpus</i> | 2        | 0         | -      | -     |
| Cricetidae | <i>Peromyscus melanophrys</i>  | 32       | 0         | -      | -     |
| Cricetidae | <i>Peromyscus melanotis</i>    | 115      | 6         | 5.22   | 10.75 |
| Cricetidae | <i>Peromyscus merriami</i>     | 6        | 0         | -      | -     |
| Cricetidae | <i>Peromyscus mexicanus</i>    | 26       | 0         | -      | -     |

|              |                                    |     |    |       |       |
|--------------|------------------------------------|-----|----|-------|-------|
| Cricetidae   | <i>Peromyscus ochraventer</i>      | 22  | 2  | 9.09  | 12.20 |
| Cricetidae   | <i>Peromyscus pectoralis</i>       | 83  | 2  | 2.41  | 4.62  |
| Cricetidae   | <i>Peromyscus perfulvus</i>        | 30  | 4  | 13.33 | 19.69 |
| Cricetidae   | <i>Peromyscus schmidlyi</i>        | 1   | 0  | -     | -     |
| Cricetidae   | <i>Peromyscus spicilegus</i>       | 9   | 2  | 22.22 | 21.21 |
| Cricetidae   | <i>Peromyscus spp</i>              | 38  | 2  | 5.26  | 8.31  |
| Cricetidae   | <i>Peromyscus truei</i>            | 1   | 0  | -     | -     |
| Cricetidae   | <i>Peromyscus yucatanicus</i>      | 115 | 2  | 1.74  | 3.58  |
| Cricetidae   | <i>Reithrodontomys fulvescens</i>  | 44  | 0  | -     | -     |
| Cricetidae   | <i>Reithrodontomys gracilis</i>    | 22  | 0  | -     | -     |
| Cricetidae   | <i>Reithrodontomys megalotis</i>   | 69  | 7  | 10.14 | 18.65 |
| Cricetidae   | <i>Reithrodontomys mexicanus</i>   | 14  | 0  | -     | -     |
| Cricetidae   | <i>Reithrodontomys spp</i>         | 1   | 0  | -     | -     |
| Cricetidae   | <i>Reithrodontomys sumichrasti</i> | 36  | 12 | 33.33 | 51.88 |
| Cricetidae   | <i>Reithrodontomys microdon</i>    | 2   | 1  | 50    | 15.05 |
| Cricetidae   | <i>Sigmodon hispidus</i>           | 138 | 17 | 12.32 | 26.36 |
| Cricetidae   | <i>Sigmodon mascotensis</i>        | 105 | 6  | 5.71  | 11.55 |
| Cricetidae   | <i>Sigmodon ochrognathus</i>       | 1   | 0  | -     | -     |
| Cricetidae   | <i>Sigmodon toltecus</i>           | 34  | 0  | -     | -     |
| Cricetidae   | <i>Tylomys nudicaudus</i>          | 11  | 0  | -     | -     |
| Heteromyidae | <i>Chaetodipus hispidus</i>        | 33  | 1  | 3.03  | 4.60  |
| Heteromyidae | <i>Chaetodipus penicilatus</i>     | 109 | 11 | 10.09 | 20.56 |
| Heteromyidae | <i>Dipodomys merriami</i>          | 299 | 54 | 18.06 | 44.71 |
| Heteromyidae | <i>Dipodomys ordii</i>             | 12  | 0  | -     | -     |
| Heteromyidae | <i>Dipodomys spectabilis</i>       | 121 | 27 | 22.31 | 46.48 |
| Heteromyidae | <i>Heteromys desmarestianus</i>    | 7   | 0  | -     | -     |
| Heteromyidae | <i>Heteromys guameri</i>           | 60  | 3  | 5.00  | 8.89  |
| Heteromyidae | <i>Heteromys irruratus</i>         | 15  | 0  | -     | -     |
| Heteromyidae | <i>Heteromys pictus</i>            | 5   | 0  | -     | -     |
| Heteromyidae | <i>Hodomys alleni</i>              | 4   | 0  | -     | -     |
| Heteromyidae | <i>Liomys irroratus</i>            | 137 | 3  | 2.19  | 4.68  |
| Heteromyidae | <i>Liomys pictus</i>               | 45  | 0  | -     | -     |
| Heteromyidae | <i>Liomys spectabilis</i>          | 6   | 0  | -     | -     |
| Heteromyidae | <i>Perognatus flavus</i>           | 61  | 6  | 9.84  | 17.56 |
| Muridae      | <i>Mus musculus</i>                | 112 | 4  | 3.57  | 7.32  |
| Muridae      | <i>Rattus rattus</i>               | 32  | 2  | 6.25  | 9.41  |
| Muridae      | <i>Rattus spp</i>                  | 1   | 1  | 100   | -     |

SP. Seroprevalence. WSP. Weighted seroprevalence
